# Supplementary material
Source: publisher site journal article supplement (https://www.dovepress.com/article/409488)
Supplement: Supplementary file 1 [file get_supplementary_file.php]

### Complicated UTI Supplemental Information

**Supplemental Table 1** Complicated UTI microbial threshold recommendations with details and justification citations listed by threshold levels

| Source                              | Justification Citations        | Region | Date | Threshold CFU/mL | cUTI Description Verbatim*                              | Sex   | Specimen      | Conditions                                                                                                                         |
|-------------------------------------|--------------------------------|--------|------|------------------|---------------------------------------------------------|-------|---------------|------------------------------------------------------------------------------------------------------------------------------------|
| Expert panel <sup>50</sup>          | <a href="#">60,62,64,89,90</a> | USA    | 1992 | None given       | Recurrent UTI (patient given antimicrobial prophylaxis) | Women | Not Specified | Two culture documented episodes of acute uncomplicated infection the last 12 months with no structural or functional abnormalities |
| GESITRA /SEIMC /REIPI <sup>29</sup> | <a href="#">118</a>            | Spain  | 2015 | None given       | Recurrent                                               | Both  | Not Specified | Solid organ transplant patient ≥ 3 symptomatic UTI in 12 month or 2 in the previous 6 months                                       |

| Source                                   | Justification Citations | Region | Date | Threshold CFU/mL | cUTI Description Verbatim*         | Sex   | Specimen      | Conditions                                                                                                                                                                                                       |
|------------------------------------------|-------------------------|--------|------|------------------|------------------------------------|-------|---------------|------------------------------------------------------------------------------------------------------------------------------------------------------------------------------------------------------------------|
| GESITRA<br>/SEIMC<br>/REIP <sup>29</sup> | <a href="#">119</a>     | Spain  | 2015 | None given       | UTI                                | Both  | Not Specified | Solid organ transplant patient. Associated with structural or functional abnormalities of the genitourinary tract or presence of underlying disease, the increase risk of infection or failing therapy. Symptoms |
| UAA-<br>AAUS <sup>36</sup>               | No citation             | Asia   | 2018 | None given       | Acute uncomplicated pyelonephritis | Women | Not Specified | Symptoms                                                                                                                                                                                                         |

| Source                     | Justification Citations | Region | Date | Threshold CFU/mL | cUTI Description Verbatim*                        | Sex  | Specimen      | Conditions |
|----------------------------|-------------------------|--------|------|------------------|---------------------------------------------------|------|---------------|------------|
| UAA-<br>AAUS <sup>36</sup> | No citation             | Asia   | 2018 | None given       | Complicated UTIs with Benign Prostate Hyperplasia | Men  | Not Specified | Symptoms   |
| UAA-<br>AAUS <sup>36</sup> | No citation             | Asia   | 2018 | None given       | Complicated UTI of Urogenital Tuberculosis        | Both | Not Specified | Symptoms   |
| UAA-<br>AAUS <sup>36</sup> | No citation             | Asia   | 2018 | None given       | Complicated UTI with Diabetes Mellitus            | Both | Not Specified | Symptoms   |

| Source                      | Justification Citations              | Region | Date | Threshold CFU/mL | cUTI Description Verbatim*        | Sex  | Specimen            | Conditions                                                              |
|-----------------------------|--------------------------------------|--------|------|------------------|-----------------------------------|------|---------------------|-------------------------------------------------------------------------|
| UAA-<br>AAUS <sup>36</sup>  | No citation                          | Asia   | 2018 | None given       | Complicated UTI with urolithiasis | Both | Midstream           | Symptoms                                                                |
| NIDRR <sup>54</sup>         | No citations, but research discussed | USA    | 1992 | Any count        | UTI                               | Both | Indwelling catheter | Spinal cord injury patients<br>Symptoms and/or signs of tissue invasion |
| NIDRR <sup>54</sup>         | No citations, but research discussed | USA    | 1992 | Any count        | UTI                               | Both | Suprapubic aspirate | Spinal cord injury patients<br>Symptoms and/or signs of tissue invasion |
| ACRM<br>AAPMR <sup>52</sup> | <a href="#">54,56,76</a>             | USA    | 1995 | Any count        | UTI                               | Both | Indwelling catheter | Spinal cord injury patients, signs or symptoms                          |

| Source                      | Justification Citations  | Region | Date | Threshold CFU/mL | cUTI Description Verbatim*              | Sex  | Specimen                   | Conditions                                     |
|-----------------------------|--------------------------|--------|------|------------------|-----------------------------------------|------|----------------------------|------------------------------------------------|
| ACRM<br>AAPMR <sup>52</sup> | <a href="#">54,56,91</a> | USA    | 1995 | Any count        | UTI                                     | Both | Suprapubic aspirate        | Spinal cord injury patients, signs or symptoms |
| AMMI <sup>25</sup>          | <a href="#">91</a>       | Canada | 2005 | Any count        | Complicated UTI                         | Both | In and out catheterization | Symptoms                                       |
| UAA-<br>AAUS <sup>36</sup>  | <a href="#">54,72</a>    | Asia   | 2018 | Any count        | Complicated UTI with neurogenic bladder | Both | Suprapubic aspirate        | Symptoms                                       |
| UAA-<br>AAUS <sup>36</sup>  | <a href="#">54,72</a>    | Asia   | 2018 | Any count        | Complicated UTI with neurogenic bladder | Both | Indwelling catheter        | Symptoms                                       |

| Source              | Justification Citations              | Region | Date | Threshold CFU/mL                  | cUTI Description Verbatim* | Sex  | Specimen                        | Conditions                                                              |
|---------------------|--------------------------------------|--------|------|-----------------------------------|----------------------------|------|---------------------------------|-------------------------------------------------------------------------|
| ASM <sup>48</sup>   | 55,94                                | USA    | 2022 | Any count                         | UTI                        | Both | Suprapubic aspirate             | Symptoms                                                                |
| NIDRR <sup>54</sup> | No citations, but research discussed | USA    | 1992 | 10 <sup>2</sup> - 10 <sup>4</sup> | UTI                        | Men  | Clean void post condom catheter | Spinal cord injury patients<br>Symptoms and/or signs of tissue invasion |
| NIDRR <sup>54</sup> | No citations, but research discussed | USA    | 1992 | ≥ 10 <sup>2</sup>                 | UTI                        | Both | Intermittent catheterization    | Spinal cord injury patients<br>Symptoms and/or signs of tissue invasion |
| NIDRR <sup>54</sup> | No citations, but research discussed | USA    | 1992 | ≥ 10 <sup>2</sup>                 | UTI                        | Both | Not Specified                   | Spinal cord injury patients<br>Symptoms and/or signs of tissue invasion |

| Source                                    | Justification Citations | Region | Date | Threshold CFU/mL | cUTI Description Verbatim* | Sex  | Specimen                     | Conditions                                             |
|-------------------------------------------|-------------------------|--------|------|------------------|----------------------------|------|------------------------------|--------------------------------------------------------|
| ACRM<br>AAPMR <sup>52</sup>               | 54,56,91                | USA    | 1995 | $\geq 10^2$      | UTI                        | Both | Intermittent catheterization | Spinal cord injury patients                            |
| AMMI <sup>25</sup>                        | 91                      | Canada | 2005 | $\geq 10^2$      | Complicated UTI            | Both | Intermittent catheterization | Symptoms                                               |
| AMMI <sup>25</sup>                        | 76,120                  | Canada | 2005 | $\geq 10^2$      | Complicated UTI            | Both | Indwelling catheterization   | Symptoms                                               |
| GESITRA<br>/SEIMC<br>/REIPI <sup>29</sup> | 75                      | Spain  | 2015 | $\geq 10^2$      | Cystitis                   | Both | Catheterized                 | Transplant patient<br>Symptoms and 1 bacterial species |
| UAA-<br>AAUS <sup>36</sup>                | 54,72                   | Asia   | 2018 | $\geq 10^2$      | Complicated UTI with       | Both | Intermittent catheterization | Symptoms                                               |

| Source                         | Justification Citations          | Region        | Date | Threshold CFU/mL | cUTI Description Verbatim*                      | Sex   | Specimen      | Conditions                                                                                                                                                                                                       |
|--------------------------------|----------------------------------|---------------|------|------------------|-------------------------------------------------|-------|---------------|------------------------------------------------------------------------------------------------------------------------------------------------------------------------------------------------------------------|
|                                |                                  |               |      |                  | neurogenic bladder                              |       |               |                                                                                                                                                                                                                  |
| AUA/CUA/<br>SUFU <sup>38</sup> | <a href="#">58,77,85,121,122</a> | North America | 2019 | 10 <sup>2</sup>  | Recurrent uncomplicated urinary tract infection | Women | Not Specified | Symptomatic, recurrent defined as at least 2 culture proven symptomatic uncomplicated acute cystitis episodes in 6 months or 3 within 1 year in which symptom resolution occurred between culture proven events. |



| Source                          | Justification Citations     | Region      | Date | Threshold CFU/mL | cUTI Description Verbatim* | Sex  | Specimen                   | Conditions                                                                             |
|---------------------------------|-----------------------------|-------------|------|------------------|----------------------------|------|----------------------------|----------------------------------------------------------------------------------------|
| AMDA<br>paltc.org <sup>41</sup> | <a href="#">105,115,123</a> | USA         | 2020 | $\geq 10^2$      | Acute pyelonephritis       | Both | In and out catheter        | Long term care patient<br>Symptoms and $\geq 1$ species                                |
| AMDA<br>paltc.org <sup>41</sup> | <a href="#">105,123</a>     | USA         | 2020 | $\geq 10^2$      | Acute simple cystitis      | Both | In and out catheter        | Long term care patient<br>Symptoms and $\geq 1$ species                                |
| PHE/NHS<br><sup>43</sup>        | <a href="#">124</a>         | UK          | 2020 | $10^2$           | UTI                        | Both | Not Specified              | Symptoms and recurrent pyuria may be indicative of UTI and maybe fastidious organisms. |
| SSGO <sup>42</sup>              | <a href="#">98</a>          | Switzerland | 2020 | $\geq 10^2$      | Complicated UTI            | Both | In and out catheterization | Symptoms                                                                               |

| Source              | Justification Citations | Region      | Date | Threshold CFU/mL | cUTI Description Verbatim* | Sex   | Specimen                   | Conditions                                                                                               |
|---------------------|-------------------------|-------------|------|------------------|----------------------------|-------|----------------------------|----------------------------------------------------------------------------------------------------------|
| SSGO <sup>42</sup>  | 98                      | Switzerland | 2020 | $\geq 10^2$      | Recurrent UTI              | Both  | In and out catheterization | Symptoms                                                                                                 |
| ECLM <sup>23</sup>  | 76,84,125-127           | Europe      | 2000 | $10^3$           | UTI                        | Men   | Midstream                  | Secondary pathogens with 1 species                                                                       |
| SOGC <sup>46</sup>  | 86                      | Canada      | 2010 | $> 10^3$         | Recurrent UTI              | Women | Not Specified              | Strong symptoms                                                                                          |
| SEIMC <sup>1</sup>  | 77,128,129              | Spain       | 2017 | $\geq 10^3$      | Cystitis                   | Men   | Not Specified              | Symptoms                                                                                                 |
| ASTID <sup>40</sup> | 58,82,130               | USA         | 2019 | $> 10^3$         | Acute simple cystitis      | Both  | Not Specified              | Transplant patient UTI symptoms and $> 10\text{WBC}/\text{mm}^3$ and isolate is uropathogen.<br>Symptoms |

| Source                         | Justification Citations              | Region | Date | Threshold CFU/mL                                  | cUTI Description Verbatim* | Sex  | Specimen                        | Conditions                                                             |
|--------------------------------|--------------------------------------|--------|------|---------------------------------------------------|----------------------------|------|---------------------------------|------------------------------------------------------------------------|
| ASTID <sup>40</sup>            | <a href="#">58,82,130</a>            | USA    | 2019 | "As above" > 10 <sup>3</sup> or > 10 <sup>4</sup> | Recurrent UTI              | Both | Not Specified                   | Transplant patient "As above" and ≥ 3 UTI in prior 12 months. Symptoms |
| PHE/NHS<br><a href="#">43</a>  | <a href="#">124,131</a>              | UK     | 2020 | 10 <sup>3</sup>                                   | UTI                        | Men  | Not Specified                   | Symptoms and pure or predominant organism                              |
| NIDRR <sup>54</sup>            | No citations, but research discussed | USA    | 1992 | ≥ 10 <sup>4</sup>                                 | UTI                        | Men  | Clean void post condom catheter | Spinal cord injury patient Symptoms and/or signs of tissue invasion    |
| IDSA/FDA<br><a href="#">51</a> | <a href="#">64,84,90</a>             | USA    | 1992 | ≥ 10 <sup>4</sup>                                 | UTI                        | Men  | Clean catch                     | Symptomatic and one or more factors associated                         |

| Source                         | Justification Citations   | Region | Date | Threshold CFU/mL | cUTI Description Verbatim*         | Sex  | Specimen                                                    | Conditions                                                                                           |
|--------------------------------|---------------------------|--------|------|------------------|------------------------------------|------|-------------------------------------------------------------|------------------------------------------------------------------------------------------------------|
|                                |                           |        |      |                  |                                    |      |                                                             | with complicated UTI and $\geq 10$ WBC/mm <sup>3</sup>                                               |
| IDSA/FDA<br><a href="#">51</a> | <a href="#">88</a>        | USA    | 1992 | $\geq 10^4$      | Acute uncomplicated pyelonephritis | Both | Midstream                                                   | Symptoms and $\geq 10$ WBC/mm <sup>3</sup>                                                           |
| Expert panel <sup>50</sup>     | <a href="#">88</a>        | USA    | 1992 | $\geq 10^4$      | Acute uncomplicated pyelonephritis | Both | Midstream                                                   | Symptoms and $\geq 10$ WBC/mm <sup>3</sup> , no history of clinical evidence of urologic abnormality |
| ACRM<br>AAPMR <sup>52</sup>    | <a href="#">54,58,132</a> | USA    | 1995 | $\geq 10^4$      | UTI                                | Men  | SCI patient<br>Clean voided from catheter<br>free male with | Symptoms                                                                                             |

| Source            | Justification Citations                                  | Region | Date | Threshold CFU/mL | cUTI Description Verbatim*         | Sex   | Specimen                   | Conditions |
|-------------------|----------------------------------------------------------|--------|------|------------------|------------------------------------|-------|----------------------------|------------|
|                   |                                                          |        |      |                  |                                    |       | condom<br>catheter         |            |
| EAU <sup>24</sup> | No citations. List of references including <sup>63</sup> | Europe | 2001 | $\geq 10^4$      | Acute uncomplicated pyelonephritis | Women | Midstream                  | Symptoms   |
| EAU <sup>24</sup> | No citations. List of references including <sup>63</sup> | Europe | 2001 | $\geq 10^4$      | Complicated UTI                    | Women | In and out catheterization | Symptoms   |
| EAU <sup>24</sup> | No citations. List of                                    | Europe | 2001 | $\geq 10^4$      | Complicated UTI                    | Men   | Midstream                  | Symptoms   |

| Source                                   | Justification Citations | Region  | Date | Threshold CFU/mL  | cUTI Description Verbatim*         | Sex  | Specimen      | Conditions                                        |
|------------------------------------------|-------------------------|---------|------|-------------------|------------------------------------|------|---------------|---------------------------------------------------|
| references                               |                         |         |      |                   |                                    |      |               |                                                   |
| including <sup>63</sup>                  |                         |         |      |                   |                                    |      |               |                                                   |
| AWMF<br>(12 societies) <sup>3</sup><br>3 | <sup>51</sup>           | Germany | 2017 | 10 <sup>4</sup>   | Acute uncomplicated pyelonephritis | Both | Midstream     | Symptomatic, typical uropathogens, in one species |
| DGU <sup>34</sup>                        | <sup>51</sup>           | Germany | 2017 | 10 <sup>4</sup>   | Acute uncomplicated pyelonephritis | Both | Midstream     | Symptoms                                          |
| SEIMC <sup>1</sup>                       | <sup>51,61,129</sup>    | Spain   | 2017 | ≥ 10 <sup>4</sup> | Pyelonephritis                     | Both | Not Specified | Symptoms                                          |
| KSID & KSC <sup>37</sup>                 | <sup>57,133</sup>       | Korea   | 2018 | 10 <sup>4</sup>   | Acute pyelonephritis               | Both | Midstream     | Symptoms                                          |

| Source                     | Justification Citations   | Region | Date | Threshold CFU/mL | cUTI Description Verbatim*              | Sex  | Specimen                                                     | Conditions                                                                            |
|----------------------------|---------------------------|--------|------|------------------|-----------------------------------------|------|--------------------------------------------------------------|---------------------------------------------------------------------------------------|
| UAA-<br>AAUS <sup>36</sup> | <a href="#">54,72</a>     | Asia   | 2018 | $\geq 10^4$      | Complicated UTI with neurogenic bladder | Both | Clean voided from catheter<br>free male with condom catheter | Symptoms                                                                              |
| ASTID <sup>40</sup>        | <a href="#">58,82,130</a> | USA    | 2019 | $> 10^4$         | Acute pyelonephritis                    | Both | Not Specified                                                | Transplant patient<br>Symptoms, > 10 WBC/mm <sup>3</sup> , and isolate is uropathogen |
| ASTID <sup>40</sup>        | <a href="#">58,82,130</a> | USA    | 2019 | $> 10^4$         | UTI                                     | Both | Not Specified                                                | Transplant patient<br>Symptoms, > 10 WBC/mm <sup>3</sup> , and isolate is uropathogen |

| Source                 | Justification Citations | Region | Date | Threshold CFU/mL | cUTI Description Verbatim*                | Sex   | Specimen            | Conditions                                                                                                                               |
|------------------------|-------------------------|--------|------|------------------|-------------------------------------------|-------|---------------------|------------------------------------------------------------------------------------------------------------------------------------------|
| ASM <sup>48</sup>      | 55,94                   | USA    | 2022 | $\geq 10^4$      | UTI                                       | Both  | In and out catheter | Symptoms                                                                                                                                 |
| IDSA/FDA <sup>51</sup> | 64,90                   | USA    | 1992 | $\geq 10^5$      | Recurrent UTI (antimicrobial prophylaxis) | Women | Not Specified       | At least 3 episodes of acute uncomplicated infection documented by culture in last 12 months with no structural/functional abnormalities |
| IDSA/FDA <sup>51</sup> | 64,90                   | USA    | 1992 | $\geq 10^5$      | Complicated UTI                           | Both  | Not Specified       | Symptomatic and one or more factors associated with complicated UTI and $\geq 10$ WBC/mm <sup>3</sup>                                    |



| Source                     | Justification Citations                                       | Region | Date | Threshold CFU/mL | cUTI Description Verbatim* | Sex   | Specimen  | Conditions                                                                         |
|----------------------------|---------------------------------------------------------------|--------|------|------------------|----------------------------|-------|-----------|------------------------------------------------------------------------------------|
| Expert panel <sup>50</sup> | <a href="#">64,84,90</a>                                      | USA    | 1992 | $\geq 10^5$      | UTI                        | Men   | Midstream | Symptoms and one or more factors associated with cUTI and $\geq 10\text{WBC/mm}^3$ |
| Expert panel <sup>50</sup> | <a href="#">64,90</a>                                         | USA    | 1992 | $\geq 10^5$      | Complicated UTI            | Both  | Midstream | Symptoms and one or more factors associated with cUTI and $\geq 10\text{WBC/mm}^3$ |
| EAU <sup>24</sup>          | No citations, List of references including <a href="#">63</a> | Europe | 2001 | $\geq 10^5$      | Complicated UTI            | Women | Midstream | Symptoms                                                                           |

| Source                                    | Justification Citations  | Region | Date | Threshold CFU/mL | cUTI Description Verbatim* | Sex   | Specimen           | Conditions                                             |
|-------------------------------------------|--------------------------|--------|------|------------------|----------------------------|-------|--------------------|--------------------------------------------------------|
| AMMI <sup>25</sup>                        | 51                       | Canada | 2005 | $\geq 10^5$      | Complicated UTI            | Both  | Voided             | Symptoms                                               |
| SOGC <sup>46</sup>                        | 86                       | Canada | 2010 | $> 10^5$         | Recurrent UTI              | Women | Not Specified      | Symptoms                                               |
| GESITRA<br>/SEIMC<br>/REIPI <sup>29</sup> | 75                       | Spain  | 2015 | $\geq 10^5$      | Cystitis                   | Men   | Clean catch voided | Transplant patient<br>Symptoms and 1 bacterial species |
| GESITRA<br>/SEIMC<br>/REIPI <sup>29</sup> | 71                       | Spain  | 2015 | $\geq 10^5$      | Pyelonephritis             | Both  | Not Specified      | Transplant patient<br>Fever and symptoms               |
| ICMR <sup>39</sup>                        | No citations.<br>List of | India  | 2019 | $10^5$           | Acute pyelonephritis       | Both  | Not Specified      | Symptoms                                               |

| Source                          | Justification Citations     | Region      | Date | Threshold CFU/mL | cUTI Description Verbatim* | Sex  | Specimen  | Conditions                                              |
|---------------------------------|-----------------------------|-------------|------|------------------|----------------------------|------|-----------|---------------------------------------------------------|
| references                      |                             |             |      |                  |                            |      |           |                                                         |
| including                       |                             |             |      |                  |                            |      |           |                                                         |
| <a href="#">17,26,57</a>        |                             |             |      |                  |                            |      |           |                                                         |
| AMDA<br>paltc.org <sup>41</sup> | <a href="#">105,115,123</a> | USA         | 2020 | $> 10^5$         | Acute simple cystitis      | Both | Midstream | Long term care patient<br>Symptoms and $\leq 2$ species |
| AMDA<br>paltc.org <sup>41</sup> | <a href="#">105,115,123</a> | USA         | 2020 | $\geq 10^5$      | Acute pyelonephritis       | Both | Midstream | Long term care patient<br>Symptoms and $\leq 2$ species |
| SSGO <sup>42</sup>              | <a href="#">98</a>          | Switzerland | 2020 | $\geq 10^5$      | Complicated UTI            | Both | Midstream | Symptoms                                                |
| SSGO <sup>42</sup>              | <a href="#">98</a>          | Switzerland | 2020 | $\geq 10^5$      | Recurrent UTI              | Both | Midstream | Symptoms                                                |

| Source                                                   | Justification Citations                                   | Region | Date | Threshold CFU/mL | cUTI Description Verbatim* | Sex  | Specimen              | Conditions       |
|----------------------------------------------------------|-----------------------------------------------------------|--------|------|------------------|----------------------------|------|-----------------------|------------------|
| Expert panel; IDSA and HIVMA logos present <sup>45</sup> | <a href="#">67,85,100,107,134,</a><br><a href="#">135</a> | USA    | 2022 | $\geq 10^5$      | Complicated UTI            | Both | Not Specified         | Symptomatic only |
| ASM <sup>48</sup>                                        | <a href="#">66,136</a>                                    | USA    | 2022 | $\geq 10^5$      | UTI                        | Both | Midstream clean catch | Symptoms         |
| ASM <sup>48</sup>                                        | <a href="#">66,136</a>                                    | USA    | 2022 | $\geq 10^5$      | UTI                        | Both | Indwelling catheter   | Symptoms         |
| ASM <sup>48</sup>                                        | <a href="#">66,136</a>                                    | USA    | 2022 | $\geq 10^5$      | UTI                        | Both | Suprapubic catheter   | Symptoms         |

| Source                       | Justification Citations              | Region    | Date | Threshold CFU/mL     | cUTI Description Verbatim* | Sex   | Specimen      | Conditions                             |
|------------------------------|--------------------------------------|-----------|------|----------------------|----------------------------|-------|---------------|----------------------------------------|
| SCCM and IDSA <sup>53</sup>  | <a href="#">93,137,138</a>           | USA       | 1998 | Unclear              | UTI                        | Both  | Not Specified | Intensive care unit patient, Symptoms  |
| SBI, SPI, SBMT <sup>27</sup> | <a href="#">81,139,140</a>           | Brazil    | 2013 | No consensus         | Pyelonephritis             | Both  | Not Specified | Symptoms                               |
| AIS & APC <sup>28</sup>      | <a href="#">54,141,142</a>           | Australia | 2015 | No standard criteria | UTI                        | Both  | Not Specified | Spinal cord injury patient Symptomatic |
| ICI-RS <sup>13</sup>         | <a href="#">58,62,78,113,143,144</a> | UK        | 2019 | No consensus         | Chronic recurrent UTI      | Both  | Not Specified | Symptoms                               |
| Australia <sup>12</sup>      | <a href="#">33,86,145,146</a>        | Australia | 2022 | No consensus         | Recurrent UTI              | Women | Not Specified | Symptomatic                            |

| Source | Justification Citations | Region | Date | Threshold CFU/mL  | cUTI Description Verbatim* | Sex | Specimen | Conditions |
|--------|-------------------------|--------|------|-------------------|----------------------------|-----|----------|------------|
|        |                         |        |      | but range         |                            |     |          |            |
|        |                         |        |      | discussed         |                            |     |          |            |
|        |                         |        |      | was $\geq 10^2$ , |                            |     |          |            |
|        |                         |        |      | $10^3$ , and >    |                            |     |          |            |
|        |                         |        |      | $10^5$            |                            |     |          |            |

\* The study definition of a complicated UTI can be found in the Methods section under Data Items and Table 1, and enables the sorting of UTIs for data simplification.

### Organization Acronym Legend (for Supplemental Tables)

| <b>Acronym</b> | <b>Name</b>                                                                     | <b>Region</b> |
|----------------|---------------------------------------------------------------------------------|---------------|
| AAPMR          | American Academy of Physical Medicine and Rehabilitation                        | USA           |
| AAUS           | Asian Association of Urinary Tract Infection and Sexually Transmitted Infection | Asia          |
| ACR            | American College of Radiology                                                   | USA           |
| ACRM           | American Congress of Rehabilitation Medicine                                    | USA           |
| AIS            | Australia Institute of Sport                                                    | Australia     |
| AMDA           | The Society for Post-Acute and Long-Term Care Medicine                          | USA           |
| AMMI           | Association of Medical Microbiology and Infectious Disease                      | Canada        |
| APC            | Australian Paralympic Committee                                                 | Australia     |
| ASTID          | American Society of Transplantation Infectious Diseases                         | USA           |
| AUA            | American Urology Association                                                    | USA           |
| AWMF           | German Association of Scientific Medical Societies in Germany                   | Germany       |
| CDC            | Center for Disease Control                                                      | USA           |
| CUA            | Canadian Urological Association                                                 | Canada        |
| DGU            | German Society for Urology                                                      | Germany       |
| EAU            | European Association of Urologists                                              | Europe        |
| ECLM           | European Clinical Laboratory Medicine                                           | Europe        |
| ESCMID         | European Society of Clinical Microbiology and Infectious Diseases               | Europe        |
| FDA            | Food and Drug Administration                                                    | USA           |

|         |                                                                   |        |
|---------|-------------------------------------------------------------------|--------|
| GESITRA | Group for the Study of Infection in Transplant Recipients         | Spain  |
| HIVMA   | HIV Medicine Association                                          | USA    |
| ICMR    | Indian Council of Medical Research                                | India  |
| ICI-RS  | International Consultation on Incontinence-Research Society       | UK     |
| IDSA    | Infectious Diseases Society of American                           | USA    |
| KAUT    | Korean Association of Urogenital Tract Infection and Inflammation | Korea  |
| KSID    | Korean Society of Infectious Diseases                             | Korea  |
| KSC     | Korean Society for Chemotherapy                                   | Korea  |
| NHS     | National Health Service                                           | UK     |
| NIDRR   | National Institute on Disability and Rehabilitation Research      | USA    |
| NHSN    | National Healthcare Safety Network                                | USA    |
| PHE     | Public Health England                                             | UK     |
| REIPI   | Spanish Network for Research in Infectious Diseases               | Spain  |
| SEIMC   | Spanish Society of Infectious Diseases and Clinical Microbiology  | Spain  |
| SHEA    | Society for Healthcare Epidemiology of America                    | USA    |
| SPILF   | French Society of Infectious Diseases                             | France |
| SBI     | Sociedade Brasileira de Infectologia                              | Brazil |
| SPI     | Sociedade Paulista de Infectlogia                                 | Brazil |
| SBMT    | Sociedade Brasileira de Medicina Tropical                         | Brazil |
| SCCM    | Society of Critical Care Medicine                                 | USA    |



|      |                                                                            |             |
|------|----------------------------------------------------------------------------|-------------|
| SOGC | Society of Obstetricians and Gynaecologists of Canada                      | Canada      |
| SUFU | Society of Urodynamics, Female Pelvic Medicine & Urogenital Reconstruction | USA         |
| SSGO | Swiss Society of Gynaecology and Obstetrics                                | Switzerland |
| UAA  | Urological Association of Asia                                             | Asia        |

### Uncomplicated UTI Supplemental Information

During this review, 21 guidelines with 47 uUTI-specific recommendations were collected. Like most cUTI subsets, uUTI recommendations showed a lack of consensus (Supplemental Figure 1A and B). Like other UTI guidelines, more publications and recommendations were published in recent years and came from Europe and North America.

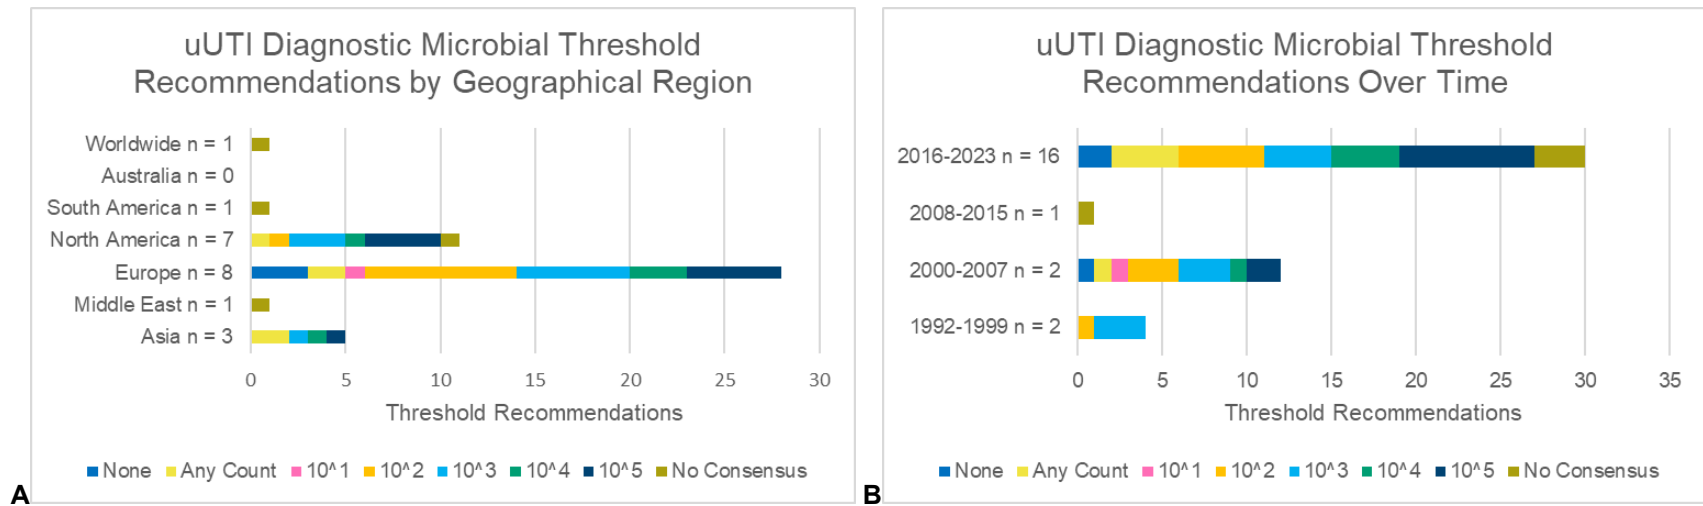

**Supplemental Figure 1** Uncomplicated UTI (uUTI) microbial threshold recommendations by A) geographical region and B) by time period. The vertical axes indicate the region or time quartile and number of guidelines. The horizontal axes indicate the number of recommendations. Guidelines often included more than one recommendation. Microbial thresholds in CFU/mL are indicated by color (none = navy blue, any count = yellow, 10<sup>1</sup> = pink, 10<sup>2</sup> = orange, 10<sup>3</sup> = light blue, 10<sup>4</sup> = green, 10<sup>5</sup> = Oxford blue, and no consensus = khaki).

## Uncomplicated UTI Supplemental Information

**Supplemental Table 2** Uncomplicated UTI (uUTI) microbial threshold recommendations with details listed by threshold levels

| Source             | Justification Citations                                                       | Region      | Date | Threshold CFU/mL | uUTI Description verbatim    | Sex   | Specimen      | Conditions                   |
|--------------------|-------------------------------------------------------------------------------|-------------|------|------------------|------------------------------|-------|---------------|------------------------------|
| EAU <sup>24</sup>  | No citations. List of references including <a href="#">59,65,73,80,97,147</a> | Europe      | 2001 | Not needed       | Acute uncomplicated cystitis | Women | Not Specified | Symptoms                     |
| DGU <sup>34</sup>  | <a href="#">86,148</a>                                                        | Germany     | 2017 | Not needed       | Acute uncomplicated cystitis | Women | Midstream     | Clear cut symptoms           |
| SSGO <sup>42</sup> | No evidence provided                                                          | Switzerland | 2020 | Not needed       | Uncomplicated UTI            | Both  | Not Specified | If not recurrent UTI or cUTI |

| Source             | Justification Citations                                                          | Region | Date | Threshold CFU/mL | uUTI Description verbatim | Sex  | Specimen            | Conditions           |
|--------------------|----------------------------------------------------------------------------------|--------|------|------------------|---------------------------|------|---------------------|----------------------|
| EAU <sup>24</sup>  | No citations.<br>List of references including <a href="#">59,65,73,80,97,147</a> | Europe | 2001 | Any count        | UTI                       | Both | Suprapubic aspirate | Symptoms             |
| SEIMC <sup>1</sup> | <a href="#">77,128,129</a>                                                       | Spain  | 2017 | Any count        | Cystitis                  | Both | Suprapubic aspirate | Symptoms             |
| ICMR <sup>39</sup> | No citations.<br>List of references including <a href="#">17,26,57</a>           | India  | 2019 | Any count        | Acute cystitis            | Both | Clean catch         | Symptoms with pyuria |

| Source                 | Justification Citations                                             | Region | Date | Threshold CFU/mL                  | uUTI Description verbatim        | Sex   | Specimen            | Conditions                       |
|------------------------|---------------------------------------------------------------------|--------|------|-----------------------------------|----------------------------------|-------|---------------------|----------------------------------|
| ICMR <sup>39</sup>     | No citations. List of references including <a href="#">17,26,57</a> | India  | 2019 | Any count                         | Acute cystitis                   | Both  | Suprapubic aspirate | Suprapubic aspirate and symptoms |
| ASM <sup>48</sup>      | <a href="#">55,94</a>                                               | USA    | 2022 | Any count                         | UTI                              | Both  | Suprapubic aspirate | Symptoms                         |
| ECLM <sup>23</sup>     | No evidence provided                                                | Europe | 2000 | 10 <sup>1</sup>                   | UTI                              | Both  | Suprapubic aspirate | Symptoms with 1-2 species        |
| IDSA/FDA <sup>51</sup> | <a href="#">60,62,89</a>                                            | USA    | 1992 | 10 <sup>2</sup> - 10 <sup>4</sup> | UTI with <i>S. saprophyticus</i> | Women | Suprapubic aspirate | Acute symptoms                   |

| Source             | Justification Citations    | Region | Date | Threshold CFU/mL  | uUTI Description verbatim | Sex   | Specimen                   | Conditions                                                       |
|--------------------|----------------------------|--------|------|-------------------|---------------------------|-------|----------------------------|------------------------------------------------------------------|
| ECLM <sup>23</sup> | No evidence provided       | Europe | 2000 | 10 <sup>2</sup>   | UTI                       | Both  | In and out catheterization | Symptoms with 1-2 species                                        |
| ECLM <sup>23</sup> | No evidence provided       | Europe | 2000 | 10 <sup>2</sup>   | UTI                       | Both  | Midstream                  | Symptoms in patients with certain urological diseases            |
| ECLM <sup>23</sup> | No evidence provided       | Europe | 2000 | 10 <sup>2</sup>   | UTI                       | Both  | Midstream                  | Precise evaluation of patients with symptoms and simple cystitis |
| SEIMC <sup>1</sup> | <a href="#">58,78</a>      | Spain  | 2017 | ≥ 10 <sup>2</sup> | Cystitis                  | Women | Not Specified              | Symptomatic                                                      |
| SEIMC <sup>1</sup> | <a href="#">77,128,129</a> | Spain  | 2017 | ≥ 10 <sup>2</sup> | Cystitis                  | Both  | In and out catheterization | Symptoms                                                         |

| Source                     | Justification Citations  | Region      | Date | Threshold CFU/mL | uUTI Description verbatim | Sex   | Specimen                   | Conditions                                              |
|----------------------------|--------------------------|-------------|------|------------------|---------------------------|-------|----------------------------|---------------------------------------------------------|
| PHE/NHS <sup>43</sup>      | <a href="#">43,62</a>    | UK          | 2020 | $\geq 10^2$      | UTI                       | Women | Voided                     | Strongly symptomatic and single isolate in voided urine |
| PHE/NHS <sup>43</sup>      | <a href="#">43,62</a>    | UK          | 2020 | $\geq 10^2$      | UTI, not recurrent        | Women | Not Specified              | < 65 years, at least one symptom                        |
| SSGO <sup>42</sup>         | <a href="#">98</a>       | Switzerland | 2020 | $\geq 10^2$      | UTI                       | Both  | In and out catheterization | UTI with strong symptoms and antibiotics not effective  |
| Expert panel <sup>50</sup> | <a href="#">60,62,89</a> | USA         | 1992 | $> 10^3$         | Acute uncomplicated UTI   | Women | Midstream                  | Symptoms and $> 10$ WBC/mm <sup>3</sup>                 |

| Source                 | Justification Citations | Region | Date | Threshold CFU/mL | uUTI Description verbatim           | Sex   | Specimen      | Conditions                                                                                                                                                        |
|------------------------|-------------------------|--------|------|------------------|-------------------------------------|-------|---------------|-------------------------------------------------------------------------------------------------------------------------------------------------------------------|
| IDSA/FDA <sup>51</sup> | <a href="#">60,62</a>   | USA    | 1992 | $\geq 10^3$      | Acute uncomplicated UTI             | Women | Not Specified | Symptoms and $\geq 10$ WBC/mm <sup>3</sup>                                                                                                                        |
| IDSA/FDA <sup>51</sup> | <a href="#">149</a>     | USA    | 1992 | $\geq 10^3$      | Candiduria (or <i>T. glabrata</i> ) | Both  | Not Specified | Pyuria (>10 WBC/mm <sup>3</sup> ) and fungal isolation on two consecutive specimens with 24-120 hours apart with symptoms and absence of indwelling foreign body. |
| ECLM <sup>23</sup>     | <a href="#">62</a>      | Europe | 2000 | $10^3$           | UTI                                 | Both  | Midstream     | Primary pathogens <i>E. coli</i> or <i>S. saprophyticus</i>                                                                                                       |



| Source                            | Justification Citations                                       | Region  | Date | Threshold CFU/mL  | uUTI Description verbatim    | Sex   | Specimen  | Conditions                                        |
|-----------------------------------|---------------------------------------------------------------|---------|------|-------------------|------------------------------|-------|-----------|---------------------------------------------------|
|                                   |                                                               |         |      |                   |                              |       |           | with symptoms. Can be 1-2 species.                |
| ECLM <sup>23</sup>                | 62                                                            | Europe  | 2000 | 10 <sup>3</sup>   | UTI                          | Both  | Midstream | Symptoms with two species and primary pathogen    |
| EAU <sup>24</sup>                 | No citations. List of references including 59,65,73,80,97,147 | Europe  | 2001 | ≥ 10 <sup>3</sup> | Acute uncomplicated cystitis | Women | Midstream | Symptoms                                          |
| AWMF (12 societies) <sup>33</sup> | 51                                                            | Germany | 2017 | 10 <sup>3</sup>   | Acute uncomplicated cystitis | Women | Midstream | Symptomatic, typical uropathogens, in one species |

| Source                  | Justification Citations | Region  | Date | Threshold CFU/mL                  | uUTI Description verbatim    | Sex   | Specimen      | Conditions                                             |
|-------------------------|-------------------------|---------|------|-----------------------------------|------------------------------|-------|---------------|--------------------------------------------------------|
| DGU <sup>34</sup>       | 51                      | Germany | 2017 | 10 <sup>3</sup>                   | Acute uncomplicated cystitis | Women | Midstream     | Symptoms                                               |
| UAA- AAUS <sup>36</sup> | 58                      | Asia    | 2018 | ≥ 10 <sup>3</sup>                 | Acute uncomplicated cystitis | Women | Not Specified | Symptomatic                                            |
| PHE/NHS <sup>43</sup>   | 43,62                   | UK      | 2020 | ≥ 10 <sup>3</sup>                 | UTI                          | Both  | Not Specified | Symptoms and <i>E. coli</i> or <i>S. saprophyticus</i> |
| ECLM <sup>23</sup>      | No evidence provided    | Europe  | 2000 | 10 <sup>4</sup>                   | UTI                          | Women | Midstream     | Secondary pathogens with 1 species                     |
| KAUT <sup>32</sup>      | 61,150,151              | Korea   | 2017 | > 10 <sup>4</sup>                 | Acute cystitis               | Both  | Not Specified | Symptoms                                               |
| PHE/NHS <sup>43</sup>   | 43                      | UK      | 2020 | 10 <sup>4</sup> - 10 <sup>5</sup> | UTI                          | Both  | Not Specified | Symptoms                                               |

| Source                | Justification Citations | Region | Date | Threshold CFU/mL | uUTI Description verbatim | Sex   | Specimen              | Conditions                                       |
|-----------------------|-------------------------|--------|------|------------------|---------------------------|-------|-----------------------|--------------------------------------------------|
| PHE/NHS <sup>43</sup> | <a href="#">43</a>      | UK     | 2020 | $\geq 10^4$      | UTI                       | Both  | Not Specified         | Symptoms                                         |
| ASM <sup>48</sup>     | <a href="#">66,136</a>  | USA    | 2022 | $\geq 10^4$      | UTI                       | Both  | In and out catheter   | Symptoms                                         |
| ECLM <sup>23</sup>    | No evidence provided    | Europe | 2000 | $10^5$           | UTI                       | Both  | Midstream             | "Doubtful" pathogens with symptoms               |
| ECLM <sup>23</sup>    | No evidence provided    | Europe | 2000 | $10^5$           | UTI                       | Both  | Midstream             | Symptoms with two species and secondary pathogen |
| SPILF <sup>35</sup>   | <a href="#">58</a>      | France | 2018 | $\geq 10^5$      | Acute cystitis            | Women | Not Specified         | Symptoms and pregnancy                           |
| FDA <sup>9</sup>      | No evidence provided    | USA    | 2019 | $\geq 10^5$      | Uncomplicated UTI         | Women | Midstream clean catch | Symptoms                                         |

| Source                | Justification Citations                                                | Region      | Date | Threshold CFU/mL  | uUTI Description verbatim | Sex  | Specimen      | Conditions                                             |
|-----------------------|------------------------------------------------------------------------|-------------|------|-------------------|---------------------------|------|---------------|--------------------------------------------------------|
| ICMR <sup>39</sup>    | No citations.<br>List of references including <a href="#">17,26,57</a> | India       | 2019 | 10 <sup>5</sup>   | Acute cystitis            | Both | Clean catch   | Symptoms                                               |
| PHE/NHS <sup>43</sup> | <a href="#">43</a>                                                     | UK          | 2020 | ≥ 10 <sup>5</sup> | UTI                       | Both | Not Specified | Symptoms and mixed growth with 1 dominant organism     |
| SSGO <sup>42</sup>    | <a href="#">98</a>                                                     | Switzerland | 2020 | ≥ 10 <sup>5</sup> | UTI                       | Both | Midstream     | UTI with strong symptoms and antibiotics not effective |
| ACR <sup>44</sup>     | <a href="#">145,152,153</a>                                            | USA         | 2020 | > 10 <sup>5</sup> | UTI                       | Both | Clean catch   | Symptoms                                               |

| Source                                                   | Justification Citations           | Region | Date | Threshold CFU/mL  | uUTI Description verbatim | Sex  | Specimen              | Conditions       |
|----------------------------------------------------------|-----------------------------------|--------|------|-------------------|---------------------------|------|-----------------------|------------------|
| Expert panel; IDSA and HIVMA logos present <sup>45</sup> | <a href="#">66,85,100,107,134</a> | USA    | 2022 | $\geq 10^5$       | UTI                       | Both | Not Specified         | Symptomatic only |
| ASM <sup>48</sup>                                        | <a href="#">55,94</a>             | USA    | 2022 | $\geq 10^5$       | UTI                       | Both | Midstream clean catch | Symptoms         |
| SBI, SPI & SBMT <sup>27</sup>                            | <a href="#">81,139,140</a>        | Brazil | 2013 | No consensus      | Candiduria                | Both | Not Specified         | Symptoms         |
| Kuwait <sup>30</sup>                                     | <a href="#">81,83,154–159</a>     | Kuwait | 2017 | None can be given | Candiduria                | Both | Not Specified         | Symptoms         |

| Source                                                      | Justification Citations | Region    | Date | Threshold CFU/mL                              | uUTI Description verbatim             | Sex  | Specimen      | Conditions                                 |
|-------------------------------------------------------------|-------------------------|-----------|------|-----------------------------------------------|---------------------------------------|------|---------------|--------------------------------------------|
| USA <sup>31</sup>                                           | 26,160                  | USA       | 2017 | None can be given. Discussed, but none given. | UTI                                   | Both | Not Specified | Culture only when UTI symptoms are present |
| GSK<br>Funded but<br>no input into<br>content <sup>47</sup> | 58                      | Worldwide | 2022 | No consensus                                  | Uncomplicated urinary tract infection | Both | Not Specified | Symptoms                                   |

### Organization Acronym Legend (for Supplemental Tables)

| <b>Acronym</b> | <b>Name</b>                                                                     | <b>Region</b> |
|----------------|---------------------------------------------------------------------------------|---------------|
| AAPMR          | American Academy of Physical Medicine and Rehabilitation                        | USA           |
| AAUS           | Asian Association of Urinary Tract Infection and Sexually Transmitted Infection | Asia          |
| ACR            | American College of Radiology                                                   | USA           |
| ACRM           | American Congress of Rehabilitation Medicine                                    | USA           |
| AIS            | Australia Institute of Sport                                                    | Australia     |
| AMDA           | The Society for Post-Acute and Long-Term Care Medicine                          | USA           |
| AMMI           | Association of Medical Microbiology and Infectious Disease                      | Canada        |
| APC            | Australian Paralympic Committee                                                 | Australia     |
| ASTID          | American Society of Transplantation Infectious Diseases                         | USA           |
| AUA            | American Urology Association                                                    | USA           |
| AWMF           | German Association of Scientific Medical Societies in Germany                   | Germany       |
| CDC            | Center for Disease Control                                                      | USA           |
| CUA            | Canadian Urological Association                                                 | Canada        |
| DGU            | German Society for Urology                                                      | Germany       |
| EAU            | European Association of Urologists                                              | Europe        |
| ECLM           | European Clinical Laboratory Medicine                                           | Europe        |
| ESCMID         | European Society of Clinical Microbiology and Infectious Diseases               | Europe        |
| FDA            | Food and Drug Administration                                                    | USA           |

|         |                                                                   |        |
|---------|-------------------------------------------------------------------|--------|
| GESITRA | Group for the Study of Infection in Transplant Recipients         | Spain  |
| HIVMA   | HIV Medicine Association                                          | USA    |
| ICMR    | Indian Council of Medical Research                                | India  |
| ICI-RS  | International Consultation on Incontinence-Research Society       | UK     |
| IDSA    | Infectious Diseases Society of American                           | USA    |
| KAUT    | Korean Association of Urogenital Tract Infection and Inflammation | Korea  |
| KSID    | Korean Society of Infectious Diseases                             | Korea  |
| KSC     | Korean Society for Chemotherapy                                   | Korea  |
| NHS     | National Health Service                                           | UK     |
| NIDRR   | National Institute on Disability and Rehabilitation Research      | USA    |
| NHSN    | National Healthcare Safety Network                                | USA    |
| PHE     | Public Health England                                             | UK     |
| REIPI   | Spanish Network for Research in Infectious Diseases               | Spain  |
| SEIMC   | Spanish Society of Infectious Diseases and Clinical Microbiology  | Spain  |
| SHEA    | Society for Healthcare Epidemiology of America                    | USA    |
| SPILF   | French Society of Infectious Diseases                             | France |
| SBI     | Sociedade Brasileira de Infectologia                              | Brazil |
| SPI     | Sociedade Paulista de Infectlogia                                 | Brazil |
| SBMT    | Sociedade Brasileira de Medicina Tropical                         | Brazil |
| SCCM    | Society of Critical Care Medicine                                 | USA    |



|      |                                                                            |             |
|------|----------------------------------------------------------------------------|-------------|
| SOGC | Society of Obstetricians and Gynaecologists of Canada                      | Canada      |
| SUFU | Society of Urodynamics, Female Pelvic Medicine & Urogenital Reconstruction | USA         |
| SSGO | Swiss Society of Gynaecology and Obstetrics                                | Switzerland |
| UAA  | Urological Association of Asia                                             | Asia        |

## CAUTI Supplemental Information

During this review, 10 guidelines with 22 CAUTI-specific recommendations were collected. Unlike other cUTI subsets, CAUTI recommendations showed more consensus (Supplemental Figure 2A and B). Like other UTI guidelines, more publications and recommendations were published in recent years and most came from Europe and North America. CAUTI recommendations were not sex specific. Three guidelines provided four recommendations for higher risk patients [ICU n =2, SCI n = 1, and Long Term Care (LTC), n = 1].

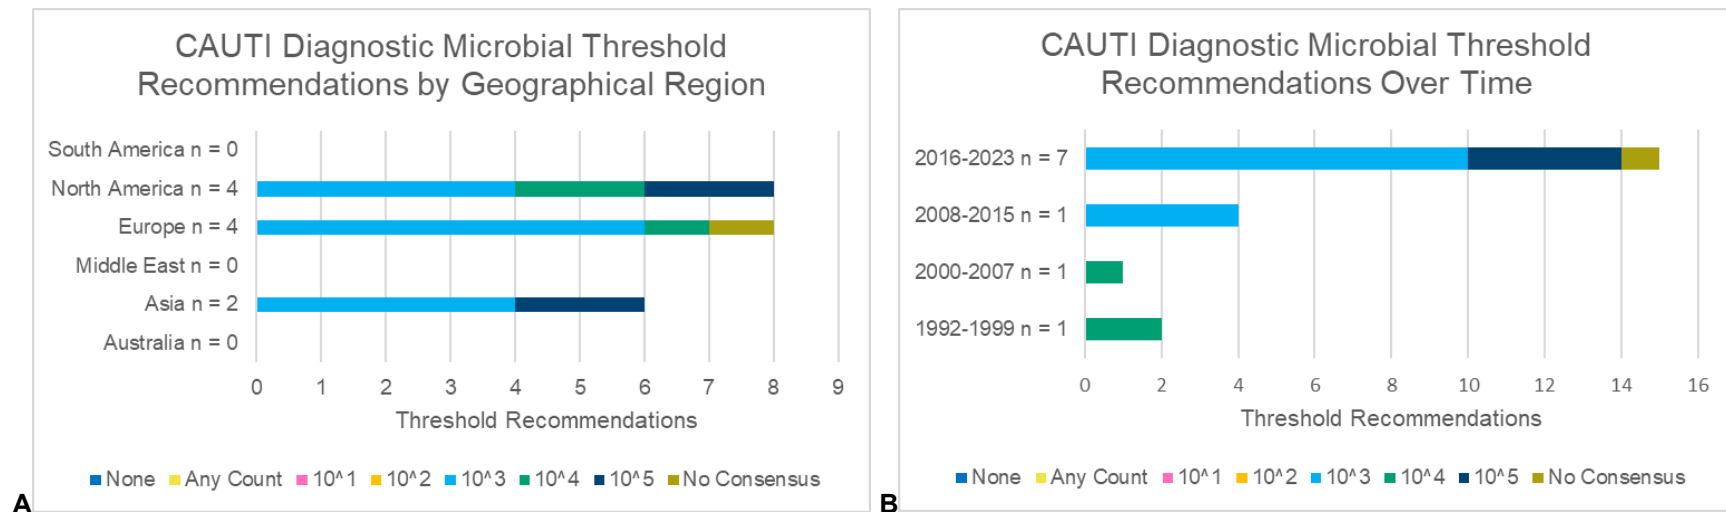

**Supplemental Figure 2** CAUTI microbial threshold recommendations by A) geographical region and B) by time period. The vertical axes indicate the number of guidelines by region or time quartile. The horizontal axes indicate the number of recommendations. Guidelines often included more than one recommendation. Microbial thresholds in CFU/mL are indicated by color (none = navy blue, any count = yellow, 10<sup>1</sup> = pink, 10<sup>2</sup> = orange, 10<sup>3</sup> = light blue, 10<sup>4</sup> = green, 10<sup>5</sup> = Oxford blue, and no consensus = khaki).

### CAUTI Supplemental Information

**Supplemental Table 3** Catheter Associated UTI (CAUTI) microbial threshold recommendations with details listed by threshold levels

| Source             | Justification Citations | Region | Date | Threshold CFU/mL | CAUTI Description verbatim | Sex  | Specimen                       | Conditions                                |
|--------------------|-------------------------|--------|------|------------------|----------------------------|------|--------------------------------|-------------------------------------------|
| IDSA <sup>26</sup> | <a href="#">62,76</a>   | USA    | 2010 | $\geq 10^3$      | CAUTI                      | Both | Indwelling urethral catheter   | Symptoms with 1 or more bacterial species |
| IDSA <sup>26</sup> | <a href="#">26</a>      | USA    | 2010 | $\geq 10^3$      | CAUTI                      | Both | Indwelling suprapubic catheter | Symptoms with 1 or more bacterial species |
| IDSA <sup>26</sup> | <a href="#">26</a>      | USA    | 2010 | $\geq 10^3$      | CAUTI                      | Both | Intermittent catheterization   | Symptoms with 1 or more bacterial species |
| IDSA <sup>26</sup> | <a href="#">26</a>      | USA    | 2010 | $\geq 10^3$      | CAUTI                      | Both | Midstream void                 | Symptoms with 1 or more bacterial species |

| Source                 | Justification Citations      | Region | Date | Threshold CFU/mL         | CAUTI Description verbatim | Sex  | Specimen            | Conditions                                                                                                 |
|------------------------|------------------------------|--------|------|--------------------------|----------------------------|------|---------------------|------------------------------------------------------------------------------------------------------------|
| SEIMC <sup>1</sup>     | <a href="#">26</a>           | Spain  | 2017 | $\geq 10^3$              | CAUTI                      | Both | Indwelling catheter | Symptoms                                                                                                   |
| SEIMC <sup>1</sup>     | <a href="#">26</a>           | Spain  | 2017 | $\geq 10^3$              | CAUTI                      | Both | Midstream void      | Symptoms                                                                                                   |
| UAA-AAUS <sup>36</sup> | No evidence provided         | Asia   | 2018 | $\geq 10^3$ and $< 10^5$ | CAUTI                      | Both | Not Specified       | No more than 2 species of microorganisms and one of [positive dipstick, pyuria, or microbes on Gram stain] |
| UAA-AAUS <sup>36</sup> | No evidence provided         | Asia   | 2018 | $< 10^3$                 | CAUTI                      | Both | Not Specified       | No more than 2 species of microorganisms, no antibiotics                                                   |
| ICMR <sup>39</sup>     | List of references at end of | India  | 2019 | $10^3$                   | CAUTI                      | Both | Catheter            | Symptoms with 1 or more bacterial species                                                                  |

| Source             | Justification Citations                                                      | Region | Date | Threshold CFU/mL  | CAUTI Description verbatim | Sex  | Specimen  | Conditions                                |
|--------------------|------------------------------------------------------------------------------|--------|------|-------------------|----------------------------|------|-----------|-------------------------------------------|
|                    | section including <sup>10,72,161,162</sup>                                   |        |      |                   |                            |      |           |                                           |
| ICMR <sup>39</sup> | List of references at end of section including <a href="#">10,72,161,162</a> | India  | 2019 | 10 <sup>3</sup>   | CAUTI                      | Both | Midstream | Symptoms with 1 or more bacterial species |
| EAU <sup>49</sup>  | <a href="#">26</a>                                                           | Europe | 2022 | ≥ 10 <sup>3</sup> | CAUTI                      | Both | Catheter  | Symptomatic and ≥ 1 bacterial species     |
| EAU <sup>49</sup>  | <a href="#">26</a>                                                           | Europe | 2022 | ≥ 10 <sup>3</sup> | CAUTI                      | Both | Midstream | Symptomatic and ≥ 1 bacterial species     |

| Source                      | Justification Citations    | Region | Date | Threshold CFU/mL | CAUTI Description verbatim | Sex  | Specimen            | Conditions                                                                |
|-----------------------------|----------------------------|--------|------|------------------|----------------------------|------|---------------------|---------------------------------------------------------------------------|
| EAU <sup>49</sup>           | <a href="#">26</a>         | Europe | 2022 | $\geq 10^3$      | CAUTI                      | Both | Catheter            | Symptoms with 1 or more species                                           |
| EAU <sup>49</sup>           | <a href="#">26</a>         | Europe | 2022 | $\geq 10^3$      | CAUTI                      | Both | Midstream           | Symptoms with 1 or more species                                           |
| SCCM and IDSA <sup>53</sup> | <a href="#">93,137,138</a> | USA    | 1998 | $> 10^4$         | CAUTI                      | Both | Clean catch         | Intensive Care Unit patients<br>Symptoms, especially if pyuria is present |
| SCCM and IDSA <sup>53</sup> | <a href="#">93,137,138</a> | USA    | 1998 | $> 10^4$         | CAUTI                      | Both | Catheter            | Intensive Care Unit patients<br>Symptoms, especially if pyuria is present |
| ECLM <sup>23</sup>          | No evidence provided       | Europe | 2000 | $10^4$           | CAUTI                      | Both | Indwelling catheter | Symptoms with 1-3 species                                                 |

| Source                                   | Justification Citations           | Region | Date | Threshold CFU/mL | CAUTI Description verbatim | Sex  | Specimen      | Conditions                                                            |
|------------------------------------------|-----------------------------------|--------|------|------------------|----------------------------|------|---------------|-----------------------------------------------------------------------|
| UAA-<br>AAUS <sup>36</sup>               | No evidence provided              | Asia   | 2018 | $\geq 10^5$      | CAUTI                      | Both | Not Specified | No more than 2 species of microorganisms, symptoms                    |
| UAA-<br>AAUS <sup>36</sup>               | No evidence provided              | Asia   | 2018 | $\geq 10^5$      | CAUTI                      | Both | Not Specified | No symptoms, no antibiotics unless undergoing a urological procedures |
| AMDA<br>paltc.org<br><a href="#">41</a>  | <a href="#">105,115,123</a>       | USA    | 2020 | $\geq 10^5$      | CAUTI                      | Both | Not Specified | Long Term Care patient Symptoms and $\geq 1$ species                  |
| Expert<br>panel;<br>IDSA<br>and<br>HIVMA | <a href="#">66,85,100,107,134</a> | USA    | 2022 | $\geq 10^5$      | CAUTI                      | Both | Catheter      | Symptomatic only                                                      |

| Source               | Justification        | Region | Date | Threshold    | CAUTI           | Sex  | Specimen                      | Conditions                                                             |
|----------------------|----------------------|--------|------|--------------|-----------------|------|-------------------------------|------------------------------------------------------------------------|
|                      | Citations            |        |      | CFU/mL       | Description     |      |                               |                                                                        |
|                      |                      |        |      |              | verbatim        |      |                               |                                                                        |
| logos                |                      |        |      |              |                 |      |                               |                                                                        |
| present <sup>4</sup> |                      |        |      |              |                 |      |                               |                                                                        |
| <a href="#">5</a>    |                      |        |      |              |                 |      |                               |                                                                        |
| ICI-RS <sup>13</sup> | No evidence provided | UK     | 2019 | No consensus | Recurrent CAUTI | Both | Intermittent, Catheterization | Neurological patients, Spinal Cord Injury patients, signs, or symptoms |



### Organization Acronym Legend (for Supplemental Tables)

| <b>Acronym</b> | <b>Name</b>                                                                     | <b>Region</b> |
|----------------|---------------------------------------------------------------------------------|---------------|
| AAPMR          | American Academy of Physical Medicine and Rehabilitation                        | USA           |
| AAUS           | Asian Association of Urinary Tract Infection and Sexually Transmitted Infection | Asia          |
| ACR            | American College of Radiology                                                   | USA           |
| ACRM           | American Congress of Rehabilitation Medicine                                    | USA           |
| AIS            | Australia Institute of Sport                                                    | Australia     |
| AMDA           | The Society for Post-Acute and Long-Term Care Medicine                          | USA           |
| AMMI           | Association of Medical Microbiology and Infectious Disease                      | Canada        |
| APC            | Australian Paralympic Committee                                                 | Australia     |
| ASTID          | American Society of Transplantation Infectious Diseases                         | USA           |
| AUA            | American Urology Association                                                    | USA           |
| AWMF           | German Association of Scientific Medical Societies in Germany                   | Germany       |
| CDC            | Center for Disease Control                                                      | USA           |
| CUA            | Canadian Urological Association                                                 | Canada        |
| DGU            | German Society for Urology                                                      | Germany       |
| EAU            | European Association of Urologists                                              | Europe        |
| ECLM           | European Clinical Laboratory Medicine                                           | Europe        |
| ESCMID         | European Society of Clinical Microbiology and Infectious Diseases               | Europe        |
| FDA            | Food and Drug Administration                                                    | USA           |

|         |                                                                   |        |
|---------|-------------------------------------------------------------------|--------|
| GESITRA | Group for the Study of Infection in Transplant Recipients         | Spain  |
| HIVMA   | HIV Medicine Association                                          | USA    |
| ICMR    | Indian Council of Medical Research                                | India  |
| ICI-RS  | International Consultation on Incontinence-Research Society       | UK     |
| IDSA    | Infectious Diseases Society of American                           | USA    |
| KAUT    | Korean Association of Urogenital Tract Infection and Inflammation | Korea  |
| KSID    | Korean Society of Infectious Diseases                             | Korea  |
| KSC     | Korean Society for Chemotherapy                                   | Korea  |
| NHS     | National Health Service                                           | UK     |
| NIDRR   | National Institute on Disability and Rehabilitation Research      | USA    |
| NHSN    | National Healthcare Safety Network                                | USA    |
| PHE     | Public Health England                                             | UK     |
| REIPI   | Spanish Network for Research in Infectious Diseases               | Spain  |
| SEIMC   | Spanish Society of Infectious Diseases and Clinical Microbiology  | Spain  |
| SHEA    | Society for Healthcare Epidemiology of America                    | USA    |
| SPILF   | French Society of Infectious Diseases                             | France |
| SBI     | Sociedade Brasileira de Infectologia                              | Brazil |
| SPI     | Sociedade Paulista de Infectlogia                                 | Brazil |
| SBMT    | Sociedade Brasileira de Medicina Tropical                         | Brazil |
| SCCM    | Society of Critical Care Medicine                                 | USA    |

|      |                                                                            |             |
|------|----------------------------------------------------------------------------|-------------|
| SOGC | Society of Obstetricians and Gynaecologists of Canada                      | Canada      |
| SUFU | Society of Urodynamics, Female Pelvic Medicine & Urogenital Reconstruction | USA         |
| SSGO | Swiss Society of Gynaecology and Obstetrics                                | Switzerland |
| UAA  | Urological Association of Asia                                             | Asia        |
